# Supplementary material
Source: publisher site journal article supplement (https://www.dovepress.com/article/supplementary_file/617742/617742%20Appendix%20A.docx)
Supplement: Supplementary file 1 [file 617742%20Appendix%20A.docx]

**Appendix A.** List of Anesthesiology Residency Programs and Website Content Scores

| PD Gender | Name of Program | Leadership & Strategic Vision | Representation | Support & Resources | Total Website |
| --- | --- | --- | --- | --- | --- |
| M | Advocate Health Care/Advocate Illinois Masonic Medical Center Program | 1 | 2 | 1 | 4 |
| F | Albany Medical Center Program | 4 | 3 | 2 | 9 |
| M | Allegheny Health Network Medical Education Consortium (AGH/WPH) Program | 3 | 1 | 2 | 6 |
| M | Ascension St John Hospital Program | 0 | 2 | 1 | 3 |
| M | Baylor All Saints Medical Center Fort Worth Program | 0 | 2 | 0 | 2 |
| M | Baylor College of Medicine Program | 0 | 2 | 2 | 4 |
| F | Beth Israel Deaconess Medical Center Program | 5 | 2 | 2 | 9 |
| M | Boston University Medical Center Program | 6 | 2 | 2 | 10 |
| M | Brown University/Rhode Island Hospital-Lifespan Program | 5 | 2 | 2 | 9 |
| F | Case Western Reserve University/University Hospitals Cleveland Medical Center Program | 4 | 3 | 0 | 7 |
| F | Cedars-Sinai Medical Center Program | 4 | 3 | 0 | 7 |
| F | Cleveland Clinic Florida Program | 0 | 2 | 0 | 2 |
| M | Cleveland Clinic Foundation Program | 6 | 3 | 2 | 11 |
| F | Cleveland Clinic Foundation/South Pointe Hospital Program | 6 | 2 | 1 | 9 |
| M | Cook County Health and Hospitals System Program | 2 | 0 | 0 | 2 |
| M | Cooper Medical School of Rowan University/Cooper University Hospital Program | 5 | 4 | 2 | 11 |
| M | Corewell Health East Beaumont (Royal Oak) Program | 0 | 2 | 2 | 4 |
| M | Dartmouth-Hitchcock/Mary Hitchcock Memorial Hospital Program | 3 | 2 | 2 | 7 |
| M | Detroit Medical Center/Wayne State University Program | 0 | 0 | 0 | 0 |
| F | Duke University Hospital Program | 3 | 2 | 2 | 7 |
| F | Emory University School of Medicine Program | 6 | 3 | 3 | 12 |
| M | Geisinger Health System Program | 3 | 1 | 2 | 6 |
| F | George Washington University Program | 5 | 2 | 2 | 9 |
| M | Hackensack University Medical Center Program | 0 | 0 | 2 | 2 |
| M | HCA Florida Healthcare/Kendall Hospital Program | 0 | 0 | 2 | 2 |
| F | HCA Florida Healthcare/USF Morsani College of Medicine GME Program | 0 | 0 | 0 | 0 |
| F | HCA Florida Healthcare/Westside/Northwest Hospital Program | 0 | 0 | 0 | 0 |
| M | HCA Healthcare Sunrise Health GME/MountainView Program | 0 | 0 | 2 | 2 |
| F | HCA Healthcare/Los Robles Regional Medical Center Program | 1 | 0 | 0 | 1 |
| M | HCA Healthcare/Mercer University School of Medicine/Grand Strand Medical Center Program | 0 | 0 | 0 | 0 |
| M | HCA HealthONE Program | 0 | 0 | 0 | 0 |
| F | Henry Ford Health/Henry Ford Hospital Program | 0 | 2 | 1 | 3 |
| M | Icahn School of Medicine at Mount Sinai/Morningside/West Program | 4 | 2 | 2 | 8 |
| M | Icahn School of Medicine at Mount Sinai/Mount Sinai Hospital Program | 5 | 1 | 2 | 8 |
| F | Indiana University School of Medicine Program | 5 | 2 | 2 | 9 |
| M | Johns Hopkins University Program | 4 | 1 | 2 | 7 |
| F | Kaweah Delta Health Care District (KDHCD) Program | 0 | 3 | 1 | 4 |
| F | Kettering Health Network Program | 0 | 1 | 2 | 3 |
| M | Lahey Clinic Program | 0 | 0 | 0 | 0 |
| M | Loma Linda University Health Education Consortium Program | 1 | 2 | 2 | 5 |
| M | Los Angeles County-Harbor-UCLA Medical Center Program | 0 | 2 | 0 | 2 |
| F | Louisiana State University (Shreveport) Program | 5 | 3 | 2 | 10 |
| M | Louisiana State University School of Medicine Program | 3 | 1 | 2 | 6 |
| M | Loyola University Medical Center Program | 5 | 2 | 1 | 8 |
| F | Maimonides Medical Center Program | 1 | 1 | 2 | 4 |
| M | Maine Medical Center Program | 5 | 3 | 3 | 11 |
| F | Mass General Brigham/Brigham and Women's Hospital Program | 6 | 3 | 2 | 11 |
| M | Mass General Brigham/Massachusetts General Hospital Program | 6 | 3 | 3 | 12 |
| F | Mayo Clinic College of Medicine and Science (Jacksonville) Program | 5 | 3 | 3 | 11 |
| F | Mayo Clinic College of Medicine and Science (Phoenix) Program | 1 | 3 | 0 | 4 |
| F | Mayo Clinic College of Medicine and Science (Rochester) Program | 6 | 3 | 2 | 11 |
| M | McGaw Medical Center of Northwestern University Program | 6 | 2 | 2 | 10 |
| M | McLaren Health Care Corporation Program | 0 | 2 | 0 | 2 |
| F | McLaren Health Care/Greater Lansing/MSU Program | 0 | 2 | 2 | 4 |
| M | McLaren Health Care/Oakland/MSU Program | 0 | 3 | 0 | 3 |
| F | Medical College of Georgia Program | 4 | 2 | 0 | 6 |
| F | Medical College of Wisconsin Affiliated Hospitals Program | 5 | 2 | 2 | 9 |
| M | Medical University of South Carolina Program | 5 | 2 | 3 | 10 |
| F | MedStar Health/Georgetown University Hospital Program | 2 | 2 | 1 | 5 |
| M | Memorial Healthcare System (Hollywood Florida) Program | 0 | 3 | 2 | 5 |
| M | Methodist Hospital (Houston) Program | 1 | 3 | 2 | 6 |
| M | Montefiore Medical Center/Albert Einstein College of Medicine Program | 4 | 1 | 2 | 7 |
| M | Mount Sinai Medical Center of Florida Inc Program | 0 | 0 | 0 | 0 |
| F | New York Presbyterian Hospital (Columbia Campus) Program | 5 | 2 | 2 | 9 |
| M | New York Presbyterian Hospital (Cornell Campus) Program | 5 | 2 | 2 | 9 |
| F | Nuvance Health Program | 3 | 1 | 2 | 6 |
| M | NYU Grossman School of Medicine Program | 5 | 0 | 2 | 7 |
| F | OhioHealth/Doctors Hospital Program | 3 | 3 | 2 | 8 |
| M | Oklahoma State University Center for Health Sciences Program | 1 | 1 | 2 | 4 |
| M | Oregon Health & Science University (OHSU Health) Program | 5 | 3 | 2 | 10 |
| F | Penn State Milton S Hershey Medical Center Program | 4 | 2 | 2 | 8 |
| M | Riverside University Health System Program | 2 | 2 | 0 | 4 |
| M | Robert Packer Hospital Program | 3 | 3 | 3 | 9 |
| M | Rush University Medical Center Program | 5 | 0 | 3 | 8 |
| M | Rutgers Health/New Jersey Medical School Program | 4 | 1 | 2 | 7 |
| M | Rutgers Health/Robert Wood Johnson Medical School Program | 3 | 0 | 2 | 5 |
| M | Sidney Kimmel Medical College at Thomas Jefferson University/TJUH Program | 6 | 1 | 2 | 9 |
| M | SSM Health/Saint Louis University School of Medicine Program | 4 | 2 | 2 | 8 |
| M | St Joseph's Medical Center Program | 2 | 3 | 2 | 7 |
| M | St Joseph's University Medical Center Program | 0 | 0 | 1 | 1 |
| M | Stanford Health Care-Sponsored Stanford University Program | 5 | 3 | 2 | 10 |
| F | Stony Brook Medicine/University Hospital Program | 5 | 4 | 2 | 11 |
| M | SUNY Downstate Health Sciences University Program | 2 | 1 | 3 | 6 |
| F | SUNY Upstate Medical University Program | 4 | 2 | 2 | 8 |
| M | Sutter Health/Sutter Roseville Medical Center Program | 3 | 1 | 1 | 5 |
| M | Temple University Hospital Program | 4 | 3 | 2 | 9 |
| M | Texas A&M College of Medicine-Scott and White Medical Center (Temple) Program | 3 | 2 | 2 | 7 |
| M | Texas Tech University Health Sciences Center at Lubbock Program | 0 | 2 | 2 | 4 |
| M | The MetroHealth System/Case Western Reserve University Program | 5 | 2 | 2 | 9 |
| M | Tower Health Program | 4 | 1 | 0 | 5 |
| M | Tufts Medical Center Program | 5 | 3 | 1 | 9 |
| F | Tulane University Program | 3 | 2 | 1 | 6 |
| M | UCLA David Geffen School of Medicine/UCLA Medical Center Program | 4 | 3 | 2 | 9 |
| M | UMass Chan Medical School Program | 1 | 3 | 2 | 6 |
| M | Umass Chan-Baystate Program | 3 | 2 | 1 | 6 |
| M | University at Buffalo Program | 3 | 2 | 0 | 5 |
| F | University of Alabama Medical Center Program | 3 | 4 | 0 | 7 |
| F | University of Arizona College of Medicine-Tucson Program | 4 | 2 | 0 | 6 |
| F | University of Arkansas for Medical Sciences (UAMS) College of Medicine Program | 4 | 2 | 1 | 7 |
| F | University of California (Irvine) Program | 5 | 4 | 0 | 9 |
| F | University of California (San Diego) Medical Center Program | 1 | 1 | 2 | 4 |
| M | University of California (San Francisco) Program | 5 | 2 | 2 | 9 |
| M | University of California Davis Health Program | 6 | 2 | 2 | 10 |
| M | University of Central Florida/HCA Florida Healthcare (Ocala) Program | 1 | 0 | 0 | 1 |
| M | University of Chicago Program | 5 | 1 | 0 | 6 |
| M | University of Cincinnati Medical Center/College of Medicine Program | 6 | 3 | 2 | 11 |
| F | University of Colorado Program | 6 | 3 | 2 | 11 |
| M | University of Connecticut Program | 4 | 2 | 2 | 8 |
| F | University of Florida College of Medicine Jacksonville Program | 0 | 4 | 0 | 4 |
| F | University of Florida Program | 6 | 3 | 2 | 11 |
| F | University of Illinois College of Medicine at Chicago Program | 0 | 2 | 0 | 2 |
| M | University of Illinois College of Medicine at Peoria Program | 4 | 2 | 0 | 6 |
| M | University of Iowa Hospitals and Clinics Program | 0 | 2 | 2 | 4 |
| M | University of Kansas (Wichita) Program | 0 | 3 | 0 | 3 |
| M | University of Kansas School of Medicine Program | 0 | 2 | 2 | 4 |
| F | University of Kentucky College of Medicine Program | 1 | 2 | 2 | 5 |
| F | University of Louisville School of Medicine Program | 4 | 2 | 2 | 8 |
| F | University of Maryland Program | 5 | 2 | 2 | 9 |
| M | University of Miami/Jackson Health System Program | 0 | 2 | 0 | 2 |
| F | University of Michigan Health System Program | 6 | 4 | 2 | 12 |
| F | University of Minnesota Program | 5 | 2 | 2 | 9 |
| F | University of Mississippi Medical Center Program | 2 | 2 | 2 | 6 |
| M | University of Missouri-Columbia Program | 4 | 2 | 3 | 9 |
| M | University of Missouri-Kansas City School of Medicine Program | 4 | 2 | 2 | 8 |
| F | University of Nebraska Medical Center College of Medicine Program | 2 | 2 | 2 | 6 |
| M | University of New Mexico School of Medicine Program | 6 | 4 | 2 | 12 |
| F | University of North Carolina Hospitals Program | 0 | 2 | 2 | 4 |
| M | University of Oklahoma Health Sciences Center Program | 0 | 4 | 2 | 6 |
| F | University of Pennsylvania Health System Program | 6 | 2 | 0 | 8 |
| M | University of Puerto Rico Program | 0 | 1 | 0 | 1 |
| F | University of Rochester Program | 5 | 2 | 2 | 9 |
| M | University of South Florida Morsani College of Medicine Program | 0 | 2 | 1 | 3 |
| F | University of Southern California/Los Angeles General Medical Center (USC/LA General) Program | 4 | 1 | 0 | 5 |
| M | University of Tennessee College of Medicine Program | 2 | 2 | 3 | 7 |
| M | University of Tennessee Medical Center at Knoxville Program | 3 | 3 | 0 | 6 |
| M | University of Texas Health Science Center at Houston Program | 0 | 3 | 1 | 4 |
| M | University of Texas Health Science Center at Tyler Program | 0 | 2 | 2 | 4 |
| F | University of Texas Health Science Center San Antonio Joe and Teresa Lozano Long School of Medicine Program | 0 | 2 | 3 | 5 |
| F | University of Texas Medical Branch Hospitals Program | 0 | 2 | 2 | 4 |
| F | University of Texas Southwestern Medical Center Program | 0 | 4 | 2 | 6 |
| M | University of Toledo Program | 4 | 2 | 3 | 9 |
| M | University of Utah Health Program | 1 | 3 | 2 | 6 |
| F | University of Vermont Medical Center Program | 3 | 2 | 2 | 7 |
| M | University of Virginia Medical Center Program | 6 | 3 | 2 | 11 |
| M | University of Washington Program | 5 | 1 | 2 | 8 |
| M | University of Wisconsin Hospitals and Clinics Program | 4 | 2 | 2 | 8 |
| M | UPMC Medical Education Program | 6 | 2 | 2 | 10 |
| M | UPMC Medical Education/Lititz Program | 5 | 2 | 2 | 9 |
| M | Vanderbilt University Medical Center Program | 4 | 3 | 2 | 9 |
| M | Virginia Commonwealth University Health System Program | 4 | 2 | 2 | 8 |
| M | Virginia Mason Franciscan Health Program | 4 | 2 | 0 | 6 |
| F | Wake Forest University Baptist Medical Center Program | 6 | 2 | 2 | 10 |
| F | Washington University/B-JH/SLCH Consortium Program | 6 | 2 | 2 | 10 |
| M | Wayne State University School of Medicine Program | 0 | 2 | 1 | 3 |
| M | West Virginia University Program | 4 | 2 | 2 | 8 |
| F | Westchester Medical Center Program | 1 | 1 | 0 | 2 |
| M | Yale-New Haven Medical Center Program | 4 | 1 | 3 | 8 |
| M | Zucker School of Medicine at Hofstra/Northwell at South Shore University Hospital Program | 5 | 2 | 2 | 9 |
| M | Zucker School of Medicine at Hofstra/Northwell Program | 4 | 1 | 1 | 6 |
